# Supplementary material for: Source identification of ambient aerosols over an urban region in western India
Source: Royal Society of Chemistry journal article supplement (doi:10.1039/b925511g), 2010-01-01

Supplemental Table S1. Number of factors 'n' vs object function 'Q' for the base case. Expected Q value ( $Q_{\text{theoretical}} = 93 * 17 - n * 93$ )

| n | Q       |
|---|---------|
| 2 | 4959.51 |
| 3 | 3779.40 |
| 4 | 2329.37 |
| 5 | 1608.85 |
| 6 | 1074.48 |
| 7 | 711.32  |
| 8 | 513.55  |
| 9 | 375.62  |

Supplemental Figure S1. Time series plot of  $\text{NH}_4^+$ ,  $\text{NO}_3^-$ , and temperature measured at Ahmedabad.

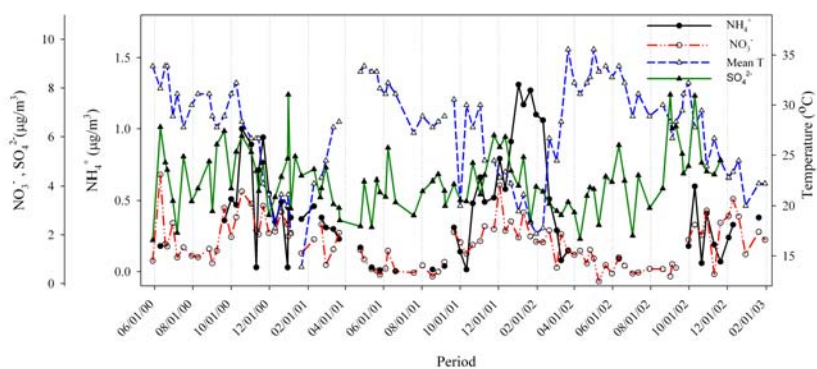

Supplemental Figure S2. PMF resolved mass concentration vs measured TSP mass.

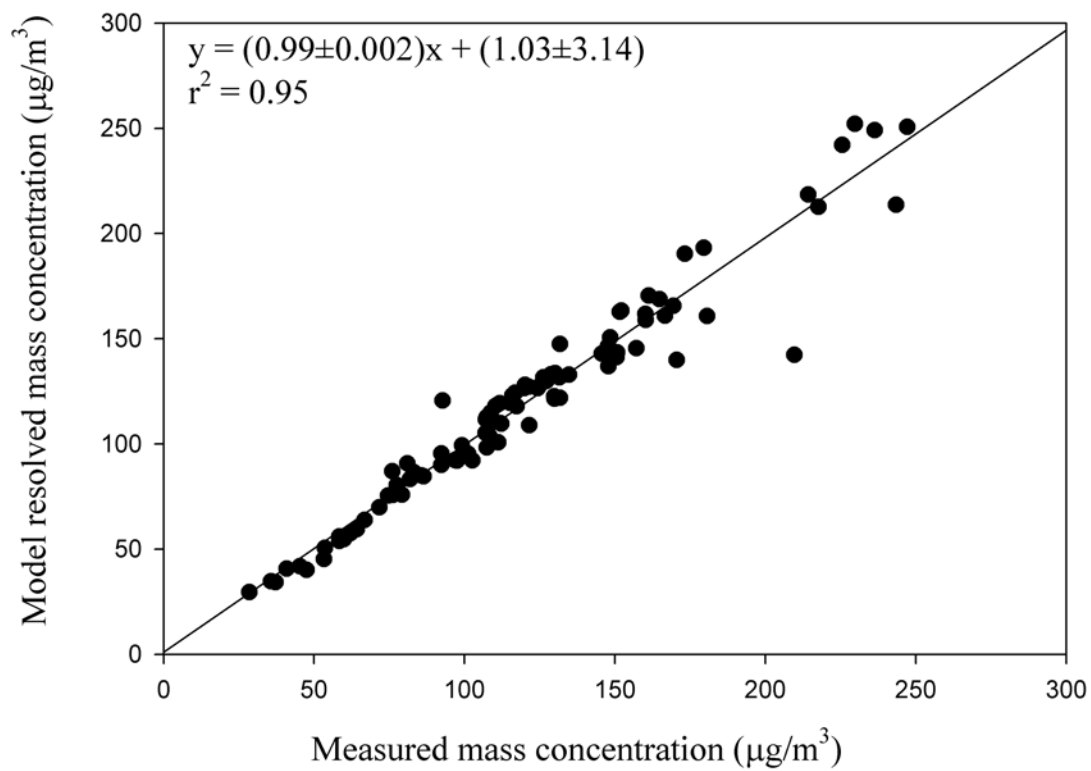

Supplemental Figure S3. NOAA HYSPLIT five-day back trajectory ending on 26 April, 2002.

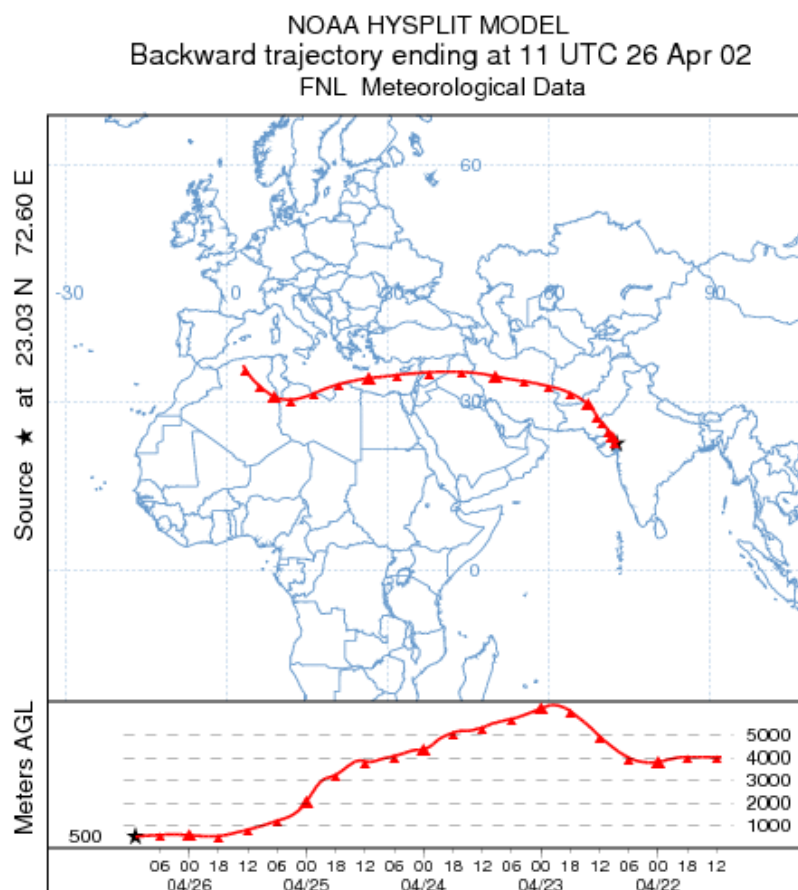

Supplement: b925511g.pdf [file b925511g.pdf]
